# Supplementary material for: Early life determinants of low IQ at age 6 in children from the 2004 Pelotas Birth Cohort: a predictive approach
Source: Springer Nature journal article supplement (doi:10.1186/s12887-014-0308-1), 2014-12-01
Supplement: MOESM1 [file 9746816]

**Early life determinants of low IQ at age 6 in children from the 2004**

**Pelotas Birth Cohort: a predictive approach**

Authors: Fabio Alberto Camargo-Figuera, Aluísio J D Barros, Iná S Santos, Alicia Matijasevich,  
Fernando C Barros.

**Additional file 1**

**Additional Table 1. Unadjusted associations of potential predictors with low IQ compared between the restricted sample and the maximum available sample. The 2004 Pelotas Birth Cohort Study.**

| Characteristic                                                                     | Maximum sample<br>Unadjusted OR<br>(95% CI) | Restricted sample<br>Unadjusted OR<br>(95% CI) |
|------------------------------------------------------------------------------------|---------------------------------------------|------------------------------------------------|
| Mother's and father's skin color (n=3518)                                          | p = 0.0000                                  | p = 0.0000                                     |
| White mother and father or either one                                              | 1                                           | 1                                              |
| Non-white mother and father                                                        | 2.5 (2.0–3.0)                               | 2.4 (2.0 – 2.9)                                |
| Teenage parents (n=3522)                                                           | p = 0.0007                                  | p = 0.0006                                     |
| Neither                                                                            | 1                                           | 1                                              |
| Both or either one                                                                 | 1.4 (1.2–1.8)                               | 1.5 (1.2 – 1.8)                                |
| Mother with a partner (n=3522)                                                     | p = 0.0069                                  | p = 0.1163                                     |
| No                                                                                 | 1.4 (1.1–1.7)                               | 1.2 (1.0 – 1.6)                                |
| Yes                                                                                | 1                                           | 1                                              |
| Father employed at the child's birth (n=3445)                                      | p = 0.0000                                  | p = 0.0000                                     |
| No                                                                                 | 2.1 (1.7–2.6)                               | 2.2 (1.7 – 2.7)                                |
| Yes                                                                                | 1                                           | 1                                              |
| Mother employed between pregnancy and the child's first 12 months of life (n=3456) | p = 0.0000                                  | p = 0.0000                                     |
| No                                                                                 | 2.0 (1.7–2.4)                               | 2.0 (1.7 – 2.5)                                |
| Employed either during pregnancy or the child's first 12 months of life            | 1                                           | 1                                              |
| Household income at the child's birth (n=3522)                                     | p = 0.0000                                  | p = 0.0000                                     |
| One or less than one monthly minimum wage                                          | 7.6 (5.3–11.1)                              | 7.4 (5.0 – 10.9)                               |
| Up to 2 monthly minimum wages                                                      | 4.5 (3.1–6.6)                               | 4.6 (3.1 – 6.7)                                |
| Up to 4 monthly minimum wages                                                      | 1.9 (1.3–2.8)                               | 1.9 (1.2 – 2.9)                                |
| More than 4 monthly minimum wages                                                  | 1                                           | 1                                              |
| Maternal education (years of schooling) (n=3490)                                   | p = 0.0000                                  | p = 0.0000                                     |
| 0–4                                                                                | 9.4 (7.1–12.4)                              | 9.0 (6.8 – 12.0)                               |
| 5–8                                                                                | 4.2 (3.3–5.3)                               | 4.0 (3.1 – 5.1)                                |
| 9 or more                                                                          | 1                                           | 1                                              |
| Number of siblings at the child's birth (n=3522)                                   | p = 0.0000                                  | p = 0.0000                                     |
| Two or less                                                                        | 1                                           | 1                                              |
| Three or more                                                                      | 3.5 (2.8–4.4)                               | 3.5 (2.8 – 4.5)                                |
| Number of persons per room at age 12 months (n=3423)                               | p = 0.0000                                  | p = 0.0000                                     |
| <3                                                                                 | 1                                           | 1                                              |
| ≥3                                                                                 | 2.2 (1.9–2.7)                               | 2.2 (1.8 – 2.7)                                |
| Maternal level of physical activity during and after pregnancy (n=3522)            | p = 0.0000                                  | p = 0.0000                                     |
| Physically inactive                                                                | 2.5 (1.9–3.3)                               | 2.4 (1.8 – 3.2)                                |
| Active either during or after pregnancy                                            | 1                                           | 1                                              |
| Maternal and paternal smoking during pregnancy (n=3522)                            | p = 0.0000                                  | p = 0.0000                                     |
| None                                                                               | 1                                           | 1                                              |
| At least one parent smoked                                                         | 2.1 (1.7–2.8)                               | 2.1 (1.8 – 2.6)                                |
| Maternal smoking during the child's first year of life (n=3404)                    | p = 0.0000                                  | p = 0.0000                                     |

|                                                                         |               |                 |
|-------------------------------------------------------------------------|---------------|-----------------|
| No                                                                      | 1             | 1               |
| Smoked                                                                  | 1.8 (1.5–2.2) | 1.8 (1.5 – 2.1) |
| Number of father-child activities at age 12 months (n=3424)             | p = 0.0008    | p = 0.0085      |
| 0–2                                                                     | 1.8 (1.3–2.5) | 1.6 (1.2 – 2.3) |
| 3–6                                                                     | 1.4 (1.1–1.9) | 1.4 (1.1 – 1.9) |
| 7 activities*                                                           | 1             | 1               |
| Childcare during the first year of life (n=3523)                        | p = 0.0008    | p = 0.0008      |
| No                                                                      | 2.3 (1.3–4.1) | 2.6 (1.4 – 4.7) |
| Yes                                                                     | 1             | 1               |
| Intended pregnancy (n=3521)                                             | p = 0.0000    | p = 0.0000      |
| Intended                                                                | 1             | 1               |
| Unintended                                                              | 1.6 (1.3–1.9) | 1.6 (1.3 – 1.9) |
| Prenatal care visits (n=3337)                                           | p = 0.0000    | p = 0.0000      |
| <6                                                                      | 2.5 (2.1–3.2) | 2.4 (1.9 – 3.1) |
| ≥6                                                                      | 1             | 1               |
| Maternal hospitalization during pregnancy (n=3522)                      | p = 0.5425    | p = 0.6891      |
| No                                                                      | 1             | 1               |
| Yes                                                                     | 0.9 (0.7–1.2) | 0.9 (0.7 – 1.3) |
| Maternal mental disorder during the child's first year of life (n=3375) | p = 0.0000    | p = 0.0000      |
| No                                                                      | 1             | 1               |
| Yes                                                                     | 1.9 (1.6–2.2) | 1.9 (1.5 – 2.3) |
| Type of delivery (n=3522)                                               | p = 0.0000    | p = 0.0000      |
| Vaginal                                                                 | 1.8 (1.5–2.2) | 1.6 (1.4 – 2.0) |
| Cesarean section                                                        | 1             | 1               |
| Gestational age (n=3521)                                                | p = 0.0009    | p = 0.0023      |
| <37 weeks                                                               | 1.5 (1.2–1.9) | 1.5 (1.2 – 1.9) |
| ≥37 weeks                                                               | 1             | 1               |
| Birth weight (n=3522)                                                   | p = 0.0003    | p = 0.0002      |
| <2500 g                                                                 | 1.7 (1.3–2.3) | 1.8 (1.3 – 2.3) |
| ≥2500 g                                                                 | 1             | 1               |
| Health condition at birth (n=3514)                                      | p = 0.0078    | p = 0.0033      |
| No                                                                      | 1             | 1               |
| Yes                                                                     | 1.4 (1.1–1.8) | 1.5 (1.2 – 2.0) |
| Child's gender (n=3522)                                                 | p = 0.0003    | p = 0.0006      |
| Female                                                                  | 1             | 1               |
| Male                                                                    | 1.4 (1.2–1.7) | 1.4 (1.1 – 1.7) |
| Child hospitalization during the first year of life (n=3424)            | p = 0.0000    | p = 0.0001      |
| No                                                                      | 1             | 1               |
| Yes                                                                     | 1.6 (1.3–2.0) | 1.5 (1.2 – 1.9) |
| Duration of breastfeeding (n=3512)                                      | p = 0.0000    | p = 0.0000      |
| <1 month                                                                | 2.2 (1.7–2.9) | 2.2 (1.7 – 2.9) |
| 1–11 months                                                             | 1.2 (1.0–1.5) | 1.2 (1.0 – 1.4) |
| ≥12 months                                                              | 1             | 1               |
| Duration of exclusive breastfeeding (n=3474)                            | p = 0.0000    | p = 0.0000      |
| <1 month                                                                | 2.8 (1.8–4.3) | 2.6 (1.7 – 4.0) |
| 1–5 months                                                              | 2.1 (1.4–3.1) | 2.0 (1.3 – 3.0) |
| ≥ 6                                                                     | 1             | 1               |

|                                                                           |               |                 |
|---------------------------------------------------------------------------|---------------|-----------------|
| Weight-for-age deficit during the first year of life (n=3522)             | p = 0.0000    | p = 0.0000      |
| No                                                                        | 1             | 1               |
| Yes                                                                       | 2.1 (1.7–2.7) | 2.1 (1.7 – 2.7) |
| Height-for-age deficit during the first year of life (n=3523)             | p = 0.0000    | p = 0.0000      |
| No                                                                        | 1             | 1               |
| Yes                                                                       | 2.0 (1.6–2.5) | 2.0 (1.6 – 2.5) |
| Head circumference-for-age deficit during the first year of life (n=3522) | p = 0.0000    | p = 0.0000      |
| No                                                                        | 1             | 1               |
| Yes                                                                       | 2.4 (1.9–3.2) | 2.4 (1.8 – 3.1) |
| Weight-for-height deficit during the first year of life (n=3521)          | p = 0.0634    | p = 0.1056      |
| No                                                                        | 1             | 1               |
| Yes                                                                       | 1.4 (1.0–2.0) | 1.4 (0.9 – 2.0) |
| Mother's self-rated health (n=3421)                                       | p = 0.0000    | p = 0.0000      |
| Excellent/very good                                                       | 1             | 1               |
| Good/fair/poor                                                            | 2.1 (1.7–2.6) | 2.0 (1.6 – 2.5) |
| Maternal perception of the child's health status (n=3424)                 | p = 0.0000    | p = 0.0000      |
| Excellent/very good                                                       | 1             | 1               |
| Good/fair/poor                                                            | 2.4 (2.0–2.9) | 2.3 (1.9 – 2.8) |

CI = confidence intervals; OR = odds ratios; IQ = intelligence quotient
